# Supplementary material for: Integrative approach to sporadic Alzheimer’s disease: deficiency of TYROBP in a tauopathy mouse model reduces C1q and normalizes clinical phenotype while increasing spread and state of phosphorylation of tau
Source: PubMed Central journal article supplement (PMC6447470; doi:10.1038/s41380-018-0258-3), 2018-10-03
Supplement: NIHMS1504014-supplement-7.pdf [file NIHMS1504014-supplement-7.pdf]

| Geneid             | Symbol         | human_gene | logFC | AveExpr | t     | P.Value     | adj.P.Val   | Contrast                            |
|--------------------|----------------|------------|-------|---------|-------|-------------|-------------|-------------------------------------|
| ENSMUSG00000095597 | Gm6472         | NA         | 3.5   | 1.5     | 31.7  | 3.35E-13    | 6.31E-09    | MAPTP301S X Tyrobp -/- vs MAPTP301S |
| ENSMUSG00000034875 | Nudt19         | NUDT19     | -1.4  | 5.5     | -22.9 | 1.75E-11    | 1.65E-07    | MAPTP301S X Tyrobp -/- vs MAPTP301S |
| ENSMUSG00000102824 | Pdcd5-ps       | PDCD5      | 3.5   | 0.0     | 19.1  | 1.60E-10    | 1.00E-06    | MAPTP301S X Tyrobp -/- vs MAPTP301S |
| ENSMUSG00000043192 | Gm1840         | NA         | 2.1   | 1.0     | 14.0  | 6.34E-09    | 2.65E-05    | MAPTP301S X Tyrobp -/- vs MAPTP301S |
| ENSMUSG00000030579 | Tyrobp         | TYROBP     | -5.1  | 1.5     | -13.8 | 7.03E-09    | 2.65E-05    | MAPTP301S X Tyrobp -/- vs MAPTP301S |
| ENSMUSG00000109205 | Gm44954        | NA         | 2.0   | 0.1     | 12.8  | 1.80E-08    | 5.64E-05    | MAPTP301S X Tyrobp -/- vs MAPTP301S |
| ENSMUSG00000082192 | Gm14719        | NA         | 1.5   | 0.2     | 12.5  | 2.36E-08    | 6.34E-05    | MAPTP301S X Tyrobp -/- vs MAPTP301S |
| ENSMUSG00000045948 | Mrps12         | MRPS12     | -0.7  | 4.3     | -11.6 | 5.35E-08    | 0.000125856 | MAPTP301S X Tyrobp -/- vs MAPTP301S |
| ENSMUSG00000021510 | Zfp729a        | ZNF729     | 0.5   | 4.7     | 10.5  | 1.58E-07    | 0.000331589 | MAPTP301S X Tyrobp -/- vs MAPTP301S |
| ENSMUSG00000114442 | AC159264.1     | NA         | 1.7   | 0.9     | 9.7   | 4.14E-07    | 0.000779052 | MAPTP301S X Tyrobp -/- vs MAPTP301S |
| ENSMUSG00000044573 | Acp1           | ACP1       | -0.4  | 5.6     | -9.2  | 7.29E-07    | 0.00117601  | MAPTP301S X Tyrobp -/- vs MAPTP301S |
| ENSMUSG00000113047 | CT009718.3     | NA         | 1.0   | 1.8     | 9.2   | 7.49E-07    | 0.00117601  | MAPTP301S X Tyrobp -/- vs MAPTP301S |
| ENSMUSG00000080893 | Gm15920        | NA         | 0.7   | 4.8     | 9.0   | 9.51E-07    | 0.001377515 | MAPTP301S X Tyrobp -/- vs MAPTP301S |
| ENSMUSG00000042831 | Alkbh6         | ALKBH6     | -0.5  | 4.1     | -8.7  | 1.25E-06    | 0.001684288 | MAPTP301S X Tyrobp -/- vs MAPTP301S |
| ENSMUSG00000040466 | BlvrB          | BLVRB      | 0.7   | 2.7     | 8.6   | 1.40E-06    | 0.001757287 | MAPTP301S X Tyrobp -/- vs MAPTP301S |
| ENSMUSG00000040084 | Bub1b          | BUB1B      | -2.2  | 0.7     | -8.4  | 1.89E-06    | 0.002226416 | MAPTP301S X Tyrobp -/- vs MAPTP301S |
| ENSMUSG00000053985 | Zfp14          | ZFP14      | 0.8   | 3.7     | 8.3   | 2.19E-06    | 0.002427098 | MAPTP301S X Tyrobp -/- vs MAPTP301S |
| ENSMUSG00000097509 | B230322F03Rik  | NA         | -1.0  | 2.2     | -8.2  | 2.57E-06    | 0.002683987 | MAPTP301S X Tyrobp -/- vs MAPTP301S |
| ENSMUSG00000063808 | Gpatch1        | GPATCH1    | -0.5  | 4.2     | -7.6  | 5.08E-06    | 0.005033166 | MAPTP301S X Tyrobp -/- vs MAPTP301S |
| ENSMUSG00000020014 | Cfap54         | CFAP54     | 1.8   | 4.6     | 7.5   | 6.19E-06    | 0.005826319 | MAPTP301S X Tyrobp -/- vs MAPTP301S |
| ENSMUSG00000021476 | Habp4          | HABP4      | -0.4  | 5.6     | -7.4  | 7.16E-06    | 0.006423816 | MAPTP301S X Tyrobp -/- vs MAPTP301S |
| ENSMUSG00000034674 | Tdg            | TDG        | -0.7  | 4.6     | -7.3  | 7.59E-06    | 0.00650128  | MAPTP301S X Tyrobp -/- vs MAPTP301S |
| ENSMUSG00000055341 | Zfp457         | ZNF93      | 1.2   | 0.3     | 7.2   | 9.07E-06    | 0.007430562 | MAPTP301S X Tyrobp -/- vs MAPTP301S |
| ENSMUSG00000000560 | Gabra2         | GABRA2     | 0.9   | 5.8     | 7.2   | 9.76E-06    | 0.007658133 | MAPTP301S X Tyrobp -/- vs MAPTP301S |
| ENSMUSG00000020019 | Ntn4           | NTN4       | 0.6   | 3.4     | 7.1   | 1.07E-05    | 0.008089035 | MAPTP301S X Tyrobp -/- vs MAPTP301S |
| ENSMUSG00000055480 | Zfp458         | ZNF43      | -0.3  | 4.6     | -7.0  | 1.17E-05    | 0.008488673 | MAPTP301S X Tyrobp -/- vs MAPTP301S |
| ENSMUSG00000058402 | Zfp420         | ZNF420     | -0.5  | 4.2     | -6.6  | 2.11E-05    | 0.014382226 | MAPTP301S X Tyrobp -/- vs MAPTP301S |
| ENSMUSG00000035864 | Syt1           | SYT1       | -1.0  | 9.2     | -6.6  | 2.14E-05    | 0.014382226 | MAPTP301S X Tyrobp -/- vs MAPTP301S |
| ENSMUSG00000094622 | Gm3055         | ZNF624     | -0.6  | 3.0     | -6.5  | 2.45E-05    | 0.01589214  | MAPTP301S X Tyrobp -/- vs MAPTP301S |
| ENSMUSG00000093571 | Gm24757        | NA         | -0.7  | 1.7     | -6.5  | 2.59E-05    | 0.01626796  | MAPTP301S X Tyrobp -/- vs MAPTP301S |
| ENSMUSG00000094002 | Gm9866         | NA         | -0.3  | 5.1     | -6.5  | 2.71E-05    | 0.016479038 | MAPTP301S X Tyrobp -/- vs MAPTP301S |
| ENSMUSG00000112640 | AC172027.3     | NA         | -0.9  | 2.3     | -6.4  | 3.01E-05    | 0.017724694 | MAPTP301S X Tyrobp -/- vs MAPTP301S |
| ENSMUSG00000053898 | Ech1           | ECH1       | -0.5  | 5.1     | -6.4  | 3.12E-05    | 0.017724694 | MAPTP301S X Tyrobp -/- vs MAPTP301S |
| ENSMUSG00000096257 | Ccer2          | CCER2      | 1.4   | -0.3    | 6.4   | 3.20E-05    | 0.017724694 | MAPTP301S X Tyrobp -/- vs MAPTP301S |
| ENSMUSG00000095990 | Zfp97          | NA         | 0.7   | 3.0     | 6.3   | 3.61E-05    | 0.019310603 | MAPTP301S X Tyrobp -/- vs MAPTP301S |
| ENSMUSG00000058246 | Gm10037        | NA         | -0.6  | 1.9     | -6.3  | 3.69E-05    | 0.019310603 | MAPTP301S X Tyrobp -/- vs MAPTP301S |
| ENSMUSG00000030417 | Pdcd5          | PDCD5      | -0.3  | 4.5     | -6.2  | 3.92E-05    | 0.01996634  | MAPTP301S X Tyrobp -/- vs MAPTP301S |
| ENSMUSG00000040424 | Hipk4          | HIPK4      | -0.6  | 4.4     | -6.1  | 4.56E-05    | 0.022531613 | MAPTP301S X Tyrobp -/- vs MAPTP301S |
| ENSMUSG00000059975 | Zfp74          | ZNF569     | 0.4   | 3.7     | 6.1   | 4.67E-05    | 0.022531613 | MAPTP301S X Tyrobp -/- vs MAPTP301S |
| ENSMUSG00000058099 | Nfam1          | NFAM1      | 1.8   | -0.1    | 6.0   | 5.26E-05    | 0.024760889 | MAPTP301S X Tyrobp -/- vs MAPTP301S |
| ENSMUSG00000021594 | Srd5a1         | SRD5A1     | -0.5  | 1.7     | -6.0  | 5.39E-05    | 0.024764232 | MAPTP301S X Tyrobp -/- vs MAPTP301S |
| ENSMUSG00000094103 | 1700047117Rik2 | NA         | -0.7  | 4.9     | -6.0  | 5.60E-05    | 0.024856648 | MAPTP301S X Tyrobp -/- vs MAPTP301S |
| ENSMUSG00000030584 | Dpf1           | DPF1       | -0.5  | 4.1     | -6.0  | 5.68E-05    | 0.024856648 | MAPTP301S X Tyrobp -/- vs MAPTP301S |
| ENSMUSG00000022899 | Slc15a2        | SLC15A2    | 0.5   | 4.9     | 5.9   | 6.65E-05    | 0.028474184 | MAPTP301S X Tyrobp -/- vs MAPTP301S |
| ENSMUSG00000096718 | Zfp781         | NA         | -0.5  | 3.8     | -5.8  | 7.41E-05    | 0.031020428 | MAPTP301S X Tyrobp -/- vs MAPTP301S |
| ENSMUSG00000085666 | Gm9855         | NA         | 2.5   | 0.0     | 5.8   | 7.80E-05    | 0.031934108 | MAPTP301S X Tyrobp -/- vs MAPTP301S |
| ENSMUSG00000073427 | Gm4924         | NA         | 0.5   | 3.8     | 5.8   | 8.17E-05    | 0.032722736 | MAPTP301S X Tyrobp -/- vs MAPTP301S |
| ENSMUSG00000021597 | Slf1           | SLF1       | 0.4   | 6.0     | 5.7   | 8.94E-05    | 0.035059597 | MAPTP301S X Tyrobp -/- vs MAPTP301S |
| ENSMUSG00000030589 | Rasgrp4        | RASGRP4    | -0.5  | 2.6     | -5.7  | 9.44E-05    | 0.036283133 | MAPTP301S X Tyrobp -/- vs MAPTP301S |
| ENSMUSG00000090667 | Gm765          | NA         | 0.5   | 3.1     | 5.4   | 0.000139266 | 0.051427508 | MAPTP301S X Tyrobp -/- vs MAPTP301S |
| ENSMUSG00000030590 | Fam98c         | FAM98C     | -0.4  | 3.4     | -5.3  | 0.000160401 | 0.05594118  | MAPTP301S X Tyrobp -/- vs MAPTP301S |
| ENSMUSG00000045092 | S1pr1          | S1PR1      | -0.4  | 6.3     | -5.3  | 0.000182344 | 0.06243789  | MAPTP301S X Tyrobp -/- vs MAPTP301S |
| ENSMUSG00000020890 | Gucy2e         | GUCY2D     | 0.7   | 0.5     | 5.2   | 0.00019916  | 0.065728066 | MAPTP301S X Tyrobp -/- vs MAPTP301S |
| ENSMUSG00000078762 | Haus5          | HAUS5      | -0.5  | 2.1     | -5.2  | 0.000201577 | 0.065728066 | MAPTP301S X Tyrobp -/- vs MAPTP301S |
| ENSMUSG00000069206 | Zfp874a        | NA         | -0.3  | 4.3     | -5.2  | 0.000202423 | 0.065728066 | MAPTP301S X Tyrobp -/- vs MAPTP301S |
| ENSMUSG00000040390 | Map3k10        | MAP3K10    | 0.4   | 5.4     | 5.2   | 0.000215903 | 0.068917117 | MAPTP301S X Tyrobp -/- vs MAPTP301S |
| ENSMUSG00000037166 | Ppp1r14a       | PPP1R14A   | -1.6  | -0.1    | -5.1  | 0.000229754 | 0.07211592  | MAPTP301S X Tyrobp -/- vs MAPTP301S |
| ENSMUSG00000034867 | Ankrd27        | ANKRD27    | 0.3   | 5.0     | 5.1   | 0.000235089 | 0.072580953 | MAPTP301S X Tyrobp -/- vs MAPTP301S |
| ENSMUSG00000020018 | Snrpf          | SNRPF      | -0.5  | 3.4     | -5.1  | 0.000244916 | 0.073766038 | MAPTP301S X Tyrobp -/- vs MAPTP301S |
| ENSMUSG00000039994 | Timeless       | TIMELESS   | 0.6   | 2.5     | 5.1   | 0.000246762 | 0.073766038 | MAPTP301S X Tyrobp -/- vs MAPTP301S |

|                     |               |         |      |      |       |             |             |                                     |
|---------------------|---------------|---------|------|------|-------|-------------|-------------|-------------------------------------|
| ENSMUSG00000032036  | Kirrel3       | KIRREL3 | 0.3  | 4.5  | 5.1   | 0.000255675 | 0.074350282 | MAPTP301S X Tyrobp -/- vs MAPTP301S |
| ENSMUSG00000084347  | Akt2-ps       | NA      | 0.6  | 2.1  | 5.1   | 0.000256612 | 0.074350282 | MAPTP301S X Tyrobp -/- vs MAPTP301S |
| ENSMUSG000000113536 | CT030170.4    | NA      | 0.5  | 2.4  | 5.0   | 0.000268073 | 0.076082009 | MAPTP301S X Tyrobp -/- vs MAPTP301S |
| ENSMUSG00000098891  | Gm27753       | NA      | 0.5  | 2.0  | 5.0   | 0.000270668 | 0.076082009 | MAPTP301S X Tyrobp -/- vs MAPTP301S |
| ENSMUSG000000107092 | Gm7993        | NA      | 0.6  | 1.7  | 5.0   | 0.000289892 | 0.080287413 | MAPTP301S X Tyrobp -/- vs MAPTP301S |
| ENSMUSG00000036915  | Kirrel2       | KIRREL2 | 0.5  | 2.9  | 5.0   | 0.000298417 | 0.08145048  | MAPTP301S X Tyrobp -/- vs MAPTP301S |
| ENSMUSG00000085105  | Gm12758       | NA      | -0.3 | 3.4  | -4.9  | 0.000343375 | 0.092382629 | MAPTP301S X Tyrobp -/- vs MAPTP301S |
| ENSMUSG000000110686 | Gm45855       | NA      | 0.6  | 2.3  | 4.8   | 0.000369267 | 0.097949313 | MAPTP301S X Tyrobp -/- vs MAPTP301S |
| ENSMUSG00000036168  | Ccdc38        | CCDC38  | -0.5 | 2.8  | -4.8  | 0.000380478 | 0.099521442 | MAPTP301S X Tyrobp -/- vs MAPTP301S |
| ENSMUSG00000088025  | Rprl3         | NA      | 8.5  | 5.6  | 14.2  | 4.99E-09    | 8.93E-05    | MAPTP301S vs WT                     |
| ENSMUSG000000106540 | 4930590L14Rik | NA      | 7.2  | -2.1 | 13.5  | 9.49E-09    | 8.93E-05    | MAPTP301S vs WT                     |
| ENSG00000186868     | human_Tau     | MAPT    | 8.4  | 3.7  | 12.6  | 2.16E-08    | 0.000135785 | MAPTP301S vs WT                     |
| ENSMUSG00000066116  | Gm10154       | NA      | 7.0  | 0.2  | 12.1  | 3.17E-08    | 0.000149054 | MAPTP301S vs WT                     |
| ENSMUSG00000093686  | Gm4705        | NA      | 3.6  | 0.0  | 11.9  | 4.07E-08    | 0.000153472 | MAPTP301S vs WT                     |
| ENSMUSG00000094685  | Gm5900        | NA      | 3.3  | -0.5 | 11.6  | 5.10E-08    | 0.000160181 | MAPTP301S vs WT                     |
| ENSMUSG00000028028  | Alpk1         | ALPK1   | 1.5  | 3.5  | 11.2  | 7.81E-08    | 0.000210128 | MAPTP301S vs WT                     |
| ENSMUSG00000081229  | Lamr1-ps1     | NA      | 6.2  | -2.1 | 10.5  | 1.71E-07    | 0.000403315 | MAPTP301S vs WT                     |
| ENSMUSG000000104544 | Gm32754       | NA      | 6.5  | -2.6 | 10.0  | 2.88E-07    | 0.000544555 | MAPTP301S vs WT                     |
| ENSMUSG00000095465  | Gm6214        | NA      | 5.9  | -2.3 | 10.0  | 2.89E-07    | 0.000544555 | MAPTP301S vs WT                     |
| ENSMUSG00000061669  | Rpl34-ps2     | RPL34   | 4.7  | -1.7 | 8.2   | 2.28E-06    | 0.003900847 | MAPTP301S vs WT                     |
| ENSMUSG00000040264  | Gbp2b         | GBP3    | 8.1  | -1.5 | 7.3   | 8.48E-06    | 0.013312507 | MAPTP301S vs WT                     |
| ENSMUSG00000068396  | Rpl34-ps1     | NA      | 0.8  | 2.0  | 6.8   | 1.57E-05    | 0.022689944 | MAPTP301S vs WT                     |
| ENSMUSG00000079037  | Prnp          | PRNP    | 0.4  | 9.5  | 6.3   | 3.37E-05    | 0.04527656  | MAPTP301S vs WT                     |
| ENSMUSG00000095597  | Gm6472        | NA      | 3.2  | 1.5  | 22.4  | 2.35E-11    | 4.42E-07    | MAPTP301S X Tyrobp -/- vs WT        |
| ENSMUSG00000034875  | Nudt19        | NUDT19  | -1.3 | 5.5  | -18.0 | 3.17E-10    | 2.98E-06    | MAPTP301S X Tyrobp -/- vs WT        |
| ENSMUSG00000088025  | Rprl3         | NA      | 8.9  | 5.6  | 14.9  | 3.01E-09    | 1.89E-05    | MAPTP301S X Tyrobp -/- vs WT        |
| ENSMUSG000000106540 | 4930590L14Rik | NA      | 7.3  | -2.1 | 13.6  | 8.36E-09    | 3.30E-05    | MAPTP301S X Tyrobp -/- vs WT        |
| ENSMUSG000000102824 | Pdcd5-ps      | PDCD5   | 3.4  | 0.0  | 13.6  | 8.75E-09    | 3.30E-05    | MAPTP301S X Tyrobp -/- vs WT        |
| ENSG00000186868     | human_Tau     | MAPT    | 8.6  | 3.7  | 12.9  | 1.64E-08    | 5.15E-05    | MAPTP301S X Tyrobp -/- vs WT        |
| ENSMUSG00000030579  | Tyrobp        | TYROBP  | -4.8 | 1.5  | -12.4 | 2.47E-08    | 6.64E-05    | MAPTP301S X Tyrobp -/- vs WT        |
| ENSMUSG00000066116  | Gm10154       | NA      | 7.0  | 0.2  | 12.1  | 3.32E-08    | 7.34E-05    | MAPTP301S X Tyrobp -/- vs WT        |
| ENSMUSG00000094685  | Gm5900        | NA      | 3.3  | -0.5 | 12.0  | 3.51E-08    | 7.34E-05    | MAPTP301S X Tyrobp -/- vs WT        |
| ENSMUSG00000093686  | Gm4705        | NA      | 3.6  | 0.0  | 11.9  | 4.13E-08    | 7.78E-05    | MAPTP301S X Tyrobp -/- vs WT        |
| ENSMUSG00000028028  | Alpk1         | ALPK1   | 1.4  | 3.5  | 11.0  | 9.67E-08    | 0.000165515 | MAPTP301S X Tyrobp -/- vs WT        |
| ENSMUSG00000081229  | Lamr1-ps1     | NA      | 6.3  | -2.1 | 10.7  | 1.30E-07    | 0.000203941 | MAPTP301S X Tyrobp -/- vs WT        |
| ENSMUSG00000043192  | Gm1840        | NA      | 2.1  | 1.0  | 10.5  | 1.64E-07    | 0.00023734  | MAPTP301S X Tyrobp -/- vs WT        |
| ENSMUSG00000095465  | Gm6214        | NA      | 6.1  | -2.3 | 10.3  | 2.00E-07    | 0.000269157 | MAPTP301S X Tyrobp -/- vs WT        |
| ENSMUSG000000104544 | Gm32754       | NA      | 6.5  | -2.6 | 10.0  | 2.69E-07    | 0.000337126 | MAPTP301S X Tyrobp -/- vs WT        |
| ENSMUSG000000109205 | Gm44954       | NA      | 1.8  | 0.1  | 9.0   | 8.90E-07    | 0.00104726  | MAPTP301S X Tyrobp -/- vs WT        |
| ENSMUSG00000082192  | Gm14719       | NA      | 1.5  | 0.2  | 8.9   | 9.90E-07    | 0.001096326 | MAPTP301S X Tyrobp -/- vs WT        |
| ENSMUSG00000061669  | Rpl34-ps2     | RPL34   | 4.8  | -1.7 | 8.3   | 2.12E-06    | 0.00221606  | MAPTP301S X Tyrobp -/- vs WT        |
| ENSMUSG00000080893  | Gm15920       | NA      | 0.8  | 4.8  | 8.2   | 2.41E-06    | 0.002297174 | MAPTP301S X Tyrobp -/- vs WT        |
| ENSMUSG00000094622  | Gm3055        | ZNF624  | -0.9 | 3.0  | -8.2  | 2.44E-06    | 0.002297174 | MAPTP301S X Tyrobp -/- vs WT        |
| ENSMUSG00000034674  | Tdg           | TDG     | -1.0 | 4.6  | -8.0  | 3.09E-06    | 0.002769564 | MAPTP301S X Tyrobp -/- vs WT        |
| ENSMUSG00000000560  | Gabra2        | GABRA2  | 1.3  | 5.8  | 7.9   | 3.41E-06    | 0.002923141 | MAPTP301S X Tyrobp -/- vs WT        |
| ENSMUSG00000045948  | Mrps12        | MRPS12  | -0.6 | 4.3  | -7.8  | 4.30E-06    | 0.003437568 | MAPTP301S X Tyrobp -/- vs WT        |
| ENSMUSG00000079037  | Prnp          | PRNP    | 0.5  | 9.5  | 7.8   | 4.38E-06    | 0.003437568 | MAPTP301S X Tyrobp -/- vs WT        |
| ENSMUSG00000055480  | Zfp458        | ZNF43   | -0.4 | 4.6  | -7.7  | 4.95E-06    | 0.003728941 | MAPTP301S X Tyrobp -/- vs WT        |
| ENSMUSG00000004558  | Ndrp2         | NDRG2   | 0.5  | 9.0  | 7.5   | 6.05E-06    | 0.004380066 | MAPTP301S X Tyrobp -/- vs WT        |
| ENSMUSG00000040084  | Bub1b         | BUB1B   | -2.2 | 0.7  | -7.4  | 7.14E-06    | 0.004982353 | MAPTP301S X Tyrobp -/- vs WT        |
| ENSMUSG00000044573  | Acp1          | ACP1    | -0.4 | 5.6  | -7.3  | 7.82E-06    | 0.005257715 | MAPTP301S X Tyrobp -/- vs WT        |
| ENSMUSG00000096718  | Zfp781        | NA      | -0.7 | 3.8  | -7.2  | 9.25E-06    | 0.006009421 | MAPTP301S X Tyrobp -/- vs WT        |
| ENSMUSG00000042831  | Alkbh6        | ALKBH6  | -0.5 | 4.1  | -7.1  | 1.03E-05    | 0.006481286 | MAPTP301S X Tyrobp -/- vs WT        |
| ENSMUSG00000092837  | Rpph1         | RPPH1   | -0.9 | 12.0 | -7.0  | 1.24E-05    | 0.007534402 | MAPTP301S X Tyrobp -/- vs WT        |
| ENSMUSG00000046688  | Tifa          | TIFA    | 0.6  | 3.3  | 6.9   | 1.40E-05    | 0.008177058 | MAPTP301S X Tyrobp -/- vs WT        |
| ENSMUSG00000040466  | Blvrb         | BLVRB   | 0.8  | 2.7  | 6.9   | 1.43E-05    | 0.008177058 | MAPTP301S X Tyrobp -/- vs WT        |
| ENSMUSG000000112640 | AC172027.3    | NA      | -1.1 | 2.3  | -6.9  | 1.50E-05    | 0.008325894 | MAPTP301S X Tyrobp -/- vs WT        |
| ENSMUSG00000040264  | Gbp2b         | GBP3    | 7.6  | -1.5 | 6.8   | 1.58E-05    | 0.008479346 | MAPTP301S X Tyrobp -/- vs WT        |
| ENSMUSG00000045092  | S1pr1         | S1PR1   | -0.7 | 6.3  | -6.8  | 1.66E-05    | 0.008695233 | MAPTP301S X Tyrobp -/- vs WT        |
| ENSMUSG00000094002  | Gm9866        | NA      | -0.4 | 5.1  | -6.7  | 1.83E-05    | 0.009312257 | MAPTP301S X Tyrobp -/- vs WT        |
| ENSMUSG00000057836  | Xlr3a         | NA      | -1.6 | 0.5  | -6.7  | 2.01E-05    | 0.00994635  | MAPTP301S X Tyrobp -/- vs WT        |

|                     |               |          |      |      |      |             |             |                              |
|---------------------|---------------|----------|------|------|------|-------------|-------------|------------------------------|
| ENSMUSG00000021510  | Zfp729a       | ZNF729   | 0.4  | 4.7  | 6.6  | 2.22E-05    | 0.010705923 | MAPTP301S X Tyrobp -/- vs WT |
| ENSMUSG00000068396  | Rpl34-ps1     | NA       | 0.7  | 2.0  | 6.6  | 2.32E-05    | 0.010918368 | MAPTP301S X Tyrobp -/- vs WT |
| ENSMUSG00000060012  | Kif13b        | KIF13B   | -0.4 | 5.0  | -6.5 | 2.43E-05    | 0.0111529   | MAPTP301S X Tyrobp -/- vs WT |
| ENSMUSG000000113047 | CT009718.3    | NA       | 1.0  | 1.8  | 6.5  | 2.62E-05    | 0.011766381 | MAPTP301S X Tyrobp -/- vs WT |
| ENSMUSG00000035864  | Syt1          | SYT1     | -1.1 | 9.2  | -6.4 | 2.84E-05    | 0.012439247 | MAPTP301S X Tyrobp -/- vs WT |
| ENSMUSG00000058402  | Zfp420        | ZNF420   | -0.6 | 4.2  | -6.4 | 3.14E-05    | 0.013447601 | MAPTP301S X Tyrobp -/- vs WT |
| ENSMUSG00000076617  | Ighm          | NA       | -1.1 | 4.4  | -6.3 | 3.30E-05    | 0.013814925 | MAPTP301S X Tyrobp -/- vs WT |
| ENSMUSG00000005871  | Apc           | APC      | -0.3 | 9.0  | -6.3 | 3.40E-05    | 0.01392109  | MAPTP301S X Tyrobp -/- vs WT |
| ENSMUSG00000020014  | Cfap54        | CFAP54   | 2.0  | 4.6  | 6.3  | 3.53E-05    | 0.013975042 | MAPTP301S X Tyrobp -/- vs WT |
| ENSMUSG000000114442 | AC159264.1    | NA       | 1.4  | 0.9  | 6.3  | 3.56E-05    | 0.013975042 | MAPTP301S X Tyrobp -/- vs WT |
| ENSMUSG00000069206  | Zfp874a       | NA       | -0.4 | 4.3  | -6.3 | 3.71E-05    | 0.014257177 | MAPTP301S X Tyrobp -/- vs WT |
| ENSMUSG00000021594  | Srd5a1        | SRD5A1   | -0.7 | 1.7  | -6.2 | 3.84E-05    | 0.014480282 | MAPTP301S X Tyrobp -/- vs WT |
| ENSMUSG00000091020  | Gm5828        | NA       | 2.3  | -1.1 | 6.2  | 4.33E-05    | 0.015983027 | MAPTP301S X Tyrobp -/- vs WT |
| ENSMUSG00000073125  | Xlr3b         | NA       | -2.7 | 1.3  | -6.1 | 5.07E-05    | 0.018361089 | MAPTP301S X Tyrobp -/- vs WT |
| ENSMUSG00000021838  | Samd4         | SAMD4A   | -0.6 | 4.6  | -6.0 | 5.40E-05    | 0.019196031 | MAPTP301S X Tyrobp -/- vs WT |
| ENSMUSG00000091089  | A930018M24Rik | NA       | 1.6  | 1.3  | 6.0  | 5.57E-05    | 0.019431183 | MAPTP301S X Tyrobp -/- vs WT |
| ENSMUSG00000098891  | Gm27753       | NA       | 0.9  | 2.0  | 6.0  | 5.82E-05    | 0.019930083 | MAPTP301S X Tyrobp -/- vs WT |
| ENSMUSG00000022018  | Rgcc          | RGCC     | 0.7  | 3.7  | 5.9  | 6.77E-05    | 0.02276616  | MAPTP301S X Tyrobp -/- vs WT |
| ENSMUSG00000083623  | Gm7224        | NA       | 1.4  | 1.8  | 5.9  | 6.97E-05    | 0.022849886 | MAPTP301S X Tyrobp -/- vs WT |
| ENSMUSG00000041596  | Nlrp5-ps      | NA       | -1.2 | 4.9  | -5.8 | 7.13E-05    | 0.022849886 | MAPTP301S X Tyrobp -/- vs WT |
| ENSMUSG00000022899  | Slc15a2       | SLC15A2  | 0.7  | 4.9  | 5.8  | 7.16E-05    | 0.022849886 | MAPTP301S X Tyrobp -/- vs WT |
| ENSMUSG00000055341  | Zfp457        | ZNF93    | 1.3  | 0.3  | 5.8  | 7.52E-05    | 0.023615677 | MAPTP301S X Tyrobp -/- vs WT |
| ENSMUSG00000058147  | Xlr3c         | NA       | -3.6 | -1.2 | -5.8 | 8.10E-05    | 0.025022955 | MAPTP301S X Tyrobp -/- vs WT |
| ENSMUSG00000053985  | Zfp14         | ZFP14    | 0.7  | 3.7  | 5.7  | 8.75E-05    | 0.026240388 | MAPTP301S X Tyrobp -/- vs WT |
| ENSMUSG00000098975  | Gm27177       | NA       | -1.4 | 4.7  | -5.7 | 8.78E-05    | 0.026240388 | MAPTP301S X Tyrobp -/- vs WT |
| ENSMUSG00000093954  | Gm16867       | NA       | -1.1 | 5.1  | -5.7 | 8.96E-05    | 0.026368036 | MAPTP301S X Tyrobp -/- vs WT |
| ENSMUSG00000096795  | Zfp433        | ZNF433   | -0.7 | 3.5  | -5.7 | 9.60E-05    | 0.027809353 | MAPTP301S X Tyrobp -/- vs WT |
| ENSMUSG00000021867  | Tmem254b      | TMEM254  | -1.6 | 3.0  | -5.6 | 9.75E-05    | 0.027822622 | MAPTP301S X Tyrobp -/- vs WT |
| ENSMUSG00000095463  | Entpd4        | ENTPD4   | -0.9 | 6.0  | -5.6 | 0.000109585 | 0.030803201 | MAPTP301S X Tyrobp -/- vs WT |
| ENSMUSG00000020250  | Txnrd1        | TXNRD1   | 0.4  | 4.9  | 5.5  | 0.000115197 | 0.031904602 | MAPTP301S X Tyrobp -/- vs WT |
| ENSMUSG00000040424  | Hipk4         | HIPK4    | -0.7 | 4.4  | -5.5 | 0.000119835 | 0.032707956 | MAPTP301S X Tyrobp -/- vs WT |
| ENSMUSG000000104405 | Gm31748       | NA       | -1.1 | 0.9  | -5.5 | 0.0001328   | 0.034734121 | MAPTP301S X Tyrobp -/- vs WT |
| ENSMUSG00000039068  | Zzz3          | ZZZ3     | -0.3 | 6.7  | -5.4 | 0.000134767 | 0.034734121 | MAPTP301S X Tyrobp -/- vs WT |
| ENSMUSG00000099136  | Gm27608       | NA       | 0.9  | 2.3  | 5.4  | 0.000135546 | 0.034734121 | MAPTP301S X Tyrobp -/- vs WT |
| ENSMUSG00000020019  | Ntn4          | NTN4     | 0.6  | 3.4  | 5.4  | 0.000136424 | 0.034734121 | MAPTP301S X Tyrobp -/- vs WT |
| ENSMUSG00000072676  | Tmem254a      | TMEM254  | -1.9 | -0.8 | -5.4 | 0.00013648  | 0.034734121 | MAPTP301S X Tyrobp -/- vs WT |
| ENSMUSG00000087775  | Rplr2         | NA       | 5.1  | -2.4 | 5.4  | 0.00014322  | 0.03596338  | MAPTP301S X Tyrobp -/- vs WT |
| ENSMUSG000000103779 | Gm36931       | NA       | -1.0 | -0.1 | -5.4 | 0.000149409 | 0.037023901 | MAPTP301S X Tyrobp -/- vs WT |
| ENSMUSG00000029071  | Dvl1          | DVL1     | 0.9  | 5.9  | 5.3  | 0.000170004 | 0.041580442 | MAPTP301S X Tyrobp -/- vs WT |
| ENSMUSG00000098394  | Gm27999       | NA       | 0.8  | 2.4  | 5.3  | 0.000180584 | 0.043428103 | MAPTP301S X Tyrobp -/- vs WT |
| ENSMUSG00000063808  | Gpatch1       | GPATCH1  | -0.4 | 4.2  | -5.3 | 0.000182615 | 0.043428103 | MAPTP301S X Tyrobp -/- vs WT |
| ENSMUSG00000040724  | Kcna2         | KCNA2    | -0.4 | 8.2  | -5.2 | 0.000204507 | 0.047549031 | MAPTP301S X Tyrobp -/- vs WT |
| ENSMUSG00000022306  | Zfpm2         | ZFPM2    | -0.8 | 2.8  | -5.2 | 0.000211824 | 0.048477791 | MAPTP301S X Tyrobp -/- vs WT |
| ENSMUSG00000028104  | Polr3gl       | POLR3GL  | 0.5  | 2.7  | 5.2  | 0.000213776 | 0.048477791 | MAPTP301S X Tyrobp -/- vs WT |
| ENSMUSG00000004151  | Etv1          | ETV1     | -0.5 | 4.8  | -5.2 | 0.000216223 | 0.048477791 | MAPTP301S X Tyrobp -/- vs WT |
| ENSMUSG000000112117 | RMST_1        | NA       | 0.6  | 5.2  | 5.1  | 0.000224402 | 0.049719511 | MAPTP301S X Tyrobp -/- vs WT |
| ENSMUSG00000099315  | Gm27175       | NA       | -2.6 | -0.5 | -5.1 | 0.000229713 | 0.04988349  | MAPTP301S X Tyrobp -/- vs WT |
| ENSMUSG000000112847 | AC158605.2    | NA       | 0.9  | 0.5  | 5.1  | 0.000230439 | 0.04988349  | MAPTP301S X Tyrobp -/- vs WT |
| ENSMUSG00000067017  | Gm3608        | NA       | 0.4  | 3.9  | 5.1  | 0.000234858 | 0.050262265 | MAPTP301S X Tyrobp -/- vs WT |
| ENSMUSG00000022066  | Entpd4b       | NA       | -0.9 | 5.4  | -5.1 | 0.000246052 | 0.05201035  | MAPTP301S X Tyrobp -/- vs WT |
| ENSMUSG00000098009  | Gm5597        | NA       | -0.8 | 0.9  | -5.1 | 0.000255707 | 0.0523721   | MAPTP301S X Tyrobp -/- vs WT |
| ENSMUSG00000084347  | Akt2-ps       | NA       | 0.8  | 2.1  | 5.1  | 0.00025584  | 0.0523721   | MAPTP301S X Tyrobp -/- vs WT |
| ENSMUSG00000068877  | Selenbp2      | SELENBP1 | 1.0  | 0.0  | 5.0  | 0.000263449 | 0.053268622 | MAPTP301S X Tyrobp -/- vs WT |
| ENSMUSG00000020431  | Adcy1         | ADCY1    | -0.5 | 9.1  | -5.0 | 0.000270216 | 0.053268622 | MAPTP301S X Tyrobp -/- vs WT |
| ENSMUSG00000091511  | Vmn2r87       | NA       | -0.5 | 2.1  | -5.0 | 0.000272271 | 0.053268622 | MAPTP301S X Tyrobp -/- vs WT |
| ENSMUSG00000008730  | Hipk1         | HIPK1    | 0.5  | 6.4  | 5.0  | 0.000276292 | 0.053268622 | MAPTP301S X Tyrobp -/- vs WT |
| ENSMUSG00000093571  | Gm24757       | NA       | -0.6 | 1.7  | -5.0 | 0.000278157 | 0.053268622 | MAPTP301S X Tyrobp -/- vs WT |
| ENSMUSG000000103753 | Gm6934        | NA       | -1.9 | -0.3 | -5.0 | 0.000278471 | 0.053268622 | MAPTP301S X Tyrobp -/- vs WT |
| ENSMUSG00000098270  | Gm27221       | NA       | -0.8 | 2.5  | -5.0 | 0.000280019 | 0.053268622 | MAPTP301S X Tyrobp -/- vs WT |
| ENSMUSG000000107092 | Gm7993        | NA       | 0.8  | 1.7  | 4.9  | 0.000311627 | 0.058688772 | MAPTP301S X Tyrobp -/- vs WT |
| ENSMUSG00000085666  | Gm9855        | NA       | 4.1  | 0.0  | 4.8  | 0.000376714 | 0.069555349 | MAPTP301S X Tyrobp -/- vs WT |

|                     |               |         |      |      |      |             |             |                              |
|---------------------|---------------|---------|------|------|------|-------------|-------------|------------------------------|
| ENSMUSG00000098662  | Gm27582       | NA      | 0.7  | 2.3  | 4.8  | 0.000407123 | 0.074279737 | MAPTP301S X Tyrobp -/- vs WT |
| ENSMUSG00000035594  | Chrna5        | CHRNA5  | -0.9 | 1.5  | -4.8 | 0.000410189 | 0.074279737 | MAPTP301S X Tyrobp -/- vs WT |
| ENSMUSG00000023927  | Satb1         | SATB1   | -0.4 | 5.3  | -4.8 | 0.000419294 | 0.075205426 | MAPTP301S X Tyrobp -/- vs WT |
| ENSMUSG00000098255  | Gm27223       | NA      | -1.0 | 0.2  | -4.8 | 0.000426974 | 0.075674267 | MAPTP301S X Tyrobp -/- vs WT |
| ENSMUSG000000105843 | Gm19439       | NA      | -1.2 | 1.6  | -4.8 | 0.000431989 | 0.075674267 | MAPTP301S X Tyrobp -/- vs WT |
| ENSMUSG00000076128  | Mir686        | NA      | -0.6 | 4.2  | -4.8 | 0.000434971 | 0.075674267 | MAPTP301S X Tyrobp -/- vs WT |
| ENSMUSG00000021476  | Habp4         | HABP4   | -0.3 | 5.6  | -4.7 | 0.000437981 | 0.075674267 | MAPTP301S X Tyrobp -/- vs WT |
| ENSMUSG00000074060  | Fbxw15        | FBXW12  | -1.2 | 0.2  | -4.7 | 0.000449559 | 0.076768581 | MAPTP301S X Tyrobp -/- vs WT |
| ENSMUSG00000022325  | Pop1          | POP1    | -0.4 | 3.1  | -4.7 | 0.000452467 | 0.076768581 | MAPTP301S X Tyrobp -/- vs WT |
| ENSMUSG00000097431  | Gm26782       | NA      | -2.4 | 1.7  | -4.7 | 0.00046128  | 0.077565126 | MAPTP301S X Tyrobp -/- vs WT |
| ENSMUSG00000069755  | Zfp125        | NA      | -0.9 | 2.7  | -4.7 | 0.0004855   | 0.080915217 | MAPTP301S X Tyrobp -/- vs WT |
| ENSMUSG000000102611 | Gm37847       | NA      | -1.9 | 0.0  | -4.7 | 0.000515984 | 0.084520558 | MAPTP301S X Tyrobp -/- vs WT |
| ENSMUSG00000022193  | Psmb5         | PSMB5   | -0.4 | 5.9  | -4.7 | 0.000516108 | 0.084520558 | MAPTP301S X Tyrobp -/- vs WT |
| ENSMUSG00000094786  | Gm14403       | NA      | -0.4 | 3.5  | -4.6 | 0.000526148 | 0.085421968 | MAPTP301S X Tyrobp -/- vs WT |
| ENSMUSG00000026663  | Atf6          | ATF6    | -0.4 | 6.3  | -4.6 | 0.00054494  | 0.087716674 | MAPTP301S X Tyrobp -/- vs WT |
| ENSMUSG00000043557  | Mdga1         | MDGA1   | 0.7  | 1.6  | 4.6  | 0.000560008 | 0.089077801 | MAPTP301S X Tyrobp -/- vs WT |
| ENSMUSG00000024998  | Plce1         | PLCE1   | 0.4  | 3.9  | 4.6  | 0.000563041 | 0.089077801 | MAPTP301S X Tyrobp -/- vs WT |
| ENSMUSG00000048502  | Duxbl1        | NA      | -1.7 | -0.7 | -4.6 | 0.000567585 | 0.089077801 | MAPTP301S X Tyrobp -/- vs WT |
| ENSMUSG00000098488  | Pla2g4b       | PLA2G4B | -0.4 | 3.2  | -4.6 | 0.000574863 | 0.089474342 | MAPTP301S X Tyrobp -/- vs WT |
| ENSMUSG00000019102  | Aldh3a1       | ALDH3A1 | -0.9 | -0.4 | -4.6 | 0.000597212 | 0.092190927 | MAPTP301S X Tyrobp -/- vs WT |
| ENSMUSG00000093908  | Gm5784        | NA      | -1.1 | 0.3  | -4.6 | 0.000615132 | 0.093425686 | MAPTP301S X Tyrobp -/- vs WT |
| ENSMUSG00000037572  | Wdhd1         | WDHD1   | -0.5 | 3.1  | -4.5 | 0.000640014 | 0.096427075 | MAPTP301S X Tyrobp -/- vs WT |
| ENSMUSG00000053898  | Ech1          | ECH1    | -0.4 | 5.1  | -4.5 | 0.000646428 | 0.096427126 | MAPTP301S X Tyrobp -/- vs WT |
| ENSMUSG00000044042  | Fmn1          | FMN1    | -0.3 | 6.1  | -4.5 | 0.000651247 | 0.096427126 | MAPTP301S X Tyrobp -/- vs WT |
| ENSMUSG00000063428  | Ddo           | DDO     | -0.4 | 2.9  | -4.5 | 0.000655375 | 0.096427126 | MAPTP301S X Tyrobp -/- vs WT |
| ENSMUSG00000096257  | Ccer2         | CCER2   | 1.3  | -0.3 | 4.5  | 0.000680344 | 0.099185491 | MAPTP301S X Tyrobp -/- vs WT |
| ENSMUSG00000097509  | B230322F03Rik | NA      | -0.7 | 2.2  | -4.5 | 0.000684655 | 0.099185491 | MAPTP301S X Tyrobp -/- vs WT |
| ENSMUSG00000036915  | Kirrel2       | KIRREL2 | 0.5  | 2.9  | 4.5  | 0.000691804 | 0.099456002 | MAPTP301S X Tyrobp -/- vs WT |
